# Supplementary material
Source: Elsevier journal article supplement (https://comptes-rendus.academie-sciences.fr/biologies/article/10.1016/j.crvi.2009.07.005/file/attach/mmc1.pdf)
Supplement: mmc1 [file mmc1.pdf]

Table 4

$F_{ST}$  values (lower diagonal) and their significance (upper diagonal) among the three Noir Marron populations and 16 West Africans populations tested for the Gm system.

+:  $p < 0.05$ ; -:  $p > 0.05$  (not significant)

|               | 1     | 2      | 3      | 4     | 5      | 6     | 7     | 8      | 9      | 10     | 11     | 12    | 13    | 14     | 15    | 16    | 17     | 18    | 19 |
|---------------|-------|--------|--------|-------|--------|-------|-------|--------|--------|--------|--------|-------|-------|--------|-------|-------|--------|-------|----|
| Aluku (1)     |       | +      | -      | +     | -      | -     | +     | +      | -      | +      | -      | -     | -     | +      | +     | +     | +      | +     | +  |
| Ndjuka (2)    | 0,028 |        | -      | +     | -      | +     | +     | +      | -      | -      | -      | -     | +     | +      | +     | -     | +      | +     | -  |
| Saramaka (3)  | 0,000 | -0,008 |        | -     | -      | -     | -     | -      | -      | -      | -      | -     | -     | +      | +     | -     | +      | -     | -  |
| Dogon (4)     | 0,044 | 0,044  | 0,016  |       | +      | +     | -     | +      | +      | +      | +      | +     | -     | +      | +     | +     | +      | +     | +  |
| Bobo (5)      | 0,009 | -0,002 | -0,011 | 0,031 |        | +     | +     | +      | -      | -      | -      | -     | -     | +      | +     | +     | +      | +     | -  |
| Bwa (6)       | 0,012 | 0,040  | 0,008  | 0,014 | 0,025  |       | +     | +      | +      | +      | +      | +     | +     | +      | +     | +     | +      | +     | +  |
| Mandenka (7)  | 0,027 | 0,035  | 0,010  | 0,000 | 0,022  | 0,010 |       | +      | +      | +      | +      | +     | -     | +      | +     | +     | +      | +     | +  |
| Fulani (8)    | 0,051 | 0,017  | 0,003  | 0,013 | 0,017  | 0,028 | 0,019 |        | -      | -      | +      | +     | +     | +      | +     | +     | -      | -     | -  |
| Abron (9)     | 0,018 | 0,009  | -0,011 | 0,011 | 0,002  | 0,013 | 0,010 | 0,000  |        | -      | +      | -     | -     | +      | +     | +     | +      | -     | -  |
| Yacouba (10)  | 0,031 | 0,001  | -0,005 | 0,021 | -0,001 | 0,034 | 0,018 | 0,006  | 0,001  |        | -      | -     | -     | +      | +     | +     | +      | +     | -  |
| Baoule (11)   | 0,018 | -0,001 | -0,005 | 0,037 | -0,004 | 0,036 | 0,028 | 0,020  | 0,007  | -0,003 |        | -     | +     | +      | +     | +     | +      | +     | -  |
| Ahizi (12)    | 0,012 | -0,002 | -0,010 | 0,031 | -0,005 | 0,030 | 0,021 | 0,020  | 0,005  | -0,002 | -0,004 |       | -     | +      | +     | +     | +      | +     | -  |
| Yoruba (13)   | 0,021 | 0,014  | -0,004 | 0,003 | 0,006  | 0,011 | 0,001 | 0,006  | -0,002 | 0,003  | 0,011  | 0,007 |       | +      | +     | +     | +      | +     | -  |
| Mandara (14)  | 0,121 | 0,035  | 0,042  | 0,057 | 0,049  | 0,078 | 0,064 | 0,015  | 0,034  | 0,030  | 0,047  | 0,053 | 0,043 |        | -     | -     | -      | -     | +  |
| Fulbe (15)    | 0,150 | 0,059  | 0,066  | 0,077 | 0,071  | 0,094 | 0,086 | 0,028  | 0,052  | 0,053  | 0,068  | 0,079 | 0,064 | -0,005 |       | -     | -      | -     | +  |
| Fali (16)     | 0,085 | 0,014  | 0,019  | 0,057 | 0,026  | 0,065 | 0,059 | 0,013  | 0,021  | 0,016  | 0,024  | 0,031 | 0,034 | -0,002 | 0,006 |       | -      | -     | -  |
| Bamileke (17) | 0,100 | 0,041  | 0,030  | 0,035 | 0,047  | 0,052 | 0,047 | 0,007  | 0,022  | 0,033  | 0,050  | 0,053 | 0,031 | 0,002  | 0,006 | 0,010 |        | -     | +  |
| Bassa (18)    | 0,067 | 0,025  | 0,010  | 0,020 | 0,027  | 0,033 | 0,029 | -0,002 | 0,006  | 0,016  | 0,031  | 0,032 | 0,014 | 0,005  | 0,014 | 0,007 | -0,005 |       | -  |
| Ewondo (19)   | 0,036 | 0,001  | -0,005 | 0,015 | 0,001  | 0,029 | 0,014 | 0,001  | -0,001 | -0,008 | 0,001  | 0,001 | 0,000 | 0,021  | 0,042 | 0,011 | 0,022  | 0,007 |    |
